1 **Predicting intention to donate blood among secondary school students in Eastern Uganda:**  
2 **An application of the theory of planned behavior**

3  
4 Martha Akulume<sup>1\*</sup>¶, Angela N Kisakye<sup>1,2</sup>¶, Florence R Nankya<sup>1#</sup>, Suzanne N Kiwanuka<sup>1#</sup>

5  
6  
7  
8 <sup>1</sup>Department of Health Policy Planning and Management, Makerere University School of Public  
9 Health, College of Health Sciences, Kampala Uganda.

10 <sup>2</sup>African Field Epidemiology Network, Kampala Uganda.

11  
12  
13 \*Corresponding author

14 **Email:** [makulume@musph.ac.ug](mailto:makulume@musph.ac.ug) (MA)

15  
16  
17 ¶These authors contributed equally to this work.

18 # These authors also contributed equally to this work

## 19 **Abstract**

20 **Introduction:** The availability of donated blood in Uganda rests on the good will of voluntary  
21 blood donors. To design interventions aimed at improving the availability of donated blood, there  
22 is need to understand the predictors of blood donation. Previous studies have shown that intention  
23 to donate blood predicts the practice of blood donation.

24 **Aim:** This study aimed at applying the theory of planned behaviour to predict intention to donate  
25 blood among secondary school students, the major blood donor group in Uganda.

26 **Methods:** We conducted a cross-sectional study among 336 students from four purposively  
27 selected secondary schools in Eastern Uganda. Census sampling was used to recruit the students  
28 for this study. A self-administered questionnaire was used to collect data on socio-demographic  
29 characteristics as well as the theory of planned behavior constructs. Data were analyzed in STATA  
30 version 14 using descriptive statistics and regressions.

31 **Results:** About 75% (n=252) of the students had intention to donate blood sometime in their life.  
32 Students' perceptions of their ability to donate blood (perceived behavioural control) was the key  
33 predictor of intention to donate blood (AOR = 6.35, CI =3.32, 12.15). The influence of subjective  
34 norms (AOR = 1.97, CI = 0.92, 4.20) and attitudes towards blood donation (AOR = 1.51, CI =  
35 0.80, 2.87) did not significantly influence blood donation adjusting for other theory of planned  
36 behaviour constructs. The theory of planned behaviour constructs explained 15.5% of the students'  
37 intention to donate blood. Regarding the external factors, only location of the school (AOR = 0.50,  
38 CI = 0.27, 0.93) and knowing someone who has ever donated (AOR = 0.26, CI = 0.12, 0.56)  
39 predicted the intention to donate blood.

40 **Conclusion:** Most students intended to donate blood sometime in their life. Efforts should be made  
41 to make blood donation sites accessible to students.

42 **Key words:** Blood donation, intention, students, schools and theory of planned behaviour

## 43 **Introduction**

44 Globally, millions of lives are saved through blood transfusion each year. Despite this, the  
45 availability of blood for transfusion remains a challenge in developing countries, especially in rural  
46 areas [1, 2]. Although the World Health Organisation (WHO) recommends that at least 1% of the  
47 country's population should donate blood in order to meet the essential blood donation needs [3],  
48 only 0.5% of the population in sub-Saharan countries voluntarily donate blood [4, 5]. As such,  
49 many of the sub-Saharan countries are able to collect only half of blood required to meet their  
50 populations needs [6].

51 Uganda, one of the sub-Saharan countries requires at least 340,000 units of safe blood each year.  
52 Despite this, the country collects only 200,000 units annually [7]. To address the challenges of  
53 blood shortages in Uganda, a number of interventions have been implemented in the country the  
54 past decade, including; the establishment of seven regional blood banks that collect, test, and store  
55 blood as well as partnerships between ministry of health and various organisations (for example;  
56 the Uganda red cross society, the Uganda blood transfusion services and voluntary blood donor  
57 clubs) to host blood donation drives [8, 9]. Despite these developments, there are not enough blood  
58 donations to satisfy the medical demand for blood in the country [9]. Considering that lack of  
59 access to blood transfusions leads to an increase in the number of preventable deaths [9], there is  
60 an urgent need for interventions to address blood shortages in the country.

61 In most developing countries such as Uganda where there are no regular blood donors, blood  
62 availability is at the mercy of voluntary individuals, who are the main source of blood [10].  
63 Moreover, it is estimated that 90% of the blood donors in Uganda are secondary school students  
64 [11]. Understanding the predictors of their blood donation behaviour is the first and key step in  
65 designing interventions aimed at improving blood donations. Previous studies have shown that  
66 intention (readiness) to donate blood predicts the practice of blood donation [12, 13]. According  
67 to Ajzen's theory of planned behaviour (TPB), intention to donate blood is further determined by  
68 a person's attitude towards blood donation (feeling of favourableness or unfavourableness towards  
69 blood donation), the influence of subjective norms (perceived social pressure to donate blood) and  
70 perceived behavioural control (a person's perception of his or her ability to donate blood) [14, 15].  
71 The TPB is as an expansion of the Theory of Reasoned Action (TRA) [16]. The TRA postulated  
72 that intention to perform a certain behaviour was determined by the attitude towards a behaviour  
73 and the influence of significant others [16]. However, in circumstances where a person doesn't  
74 have full control over their behaviour, behaviour cannot be determined exclusively by their  
75 intention to perform the behaviour. Therefore, to address the limitations of the TRA, the TPB was  
76 introduced by adding a new concept, i.e. perceived behavioural control [16]. Perceived behavioural  
77 control comprises of the internal and external factors that influence behaviour either directly or  
78 indirectly through intentions [17].

79 The TPB has been increasingly applied to determine blood donation behaviours [10, 18, 19].  
80 Nonetheless, Parash and others note that most of these studies are conducted in the Indian and  
81 Western context [20]. This study therefore applies the TPB to predict blood donation behaviours  
82 among secondary school students in Uganda.

## 83 **Methods**

### 84 **Study setting and population**

85 This was a cross-sectional study conducted among students in four secondary schools in Eastern  
86 Uganda (i.e. two schools in Jinja and two schools in Mayuge districts) as part of the “*blood*  
87 *donation awareness project: a quasi-experimental*” study end-line survey [21]. Data were  
88 collected in April, 2022. The study included senior four and senior six students from the four  
89 schools because they had been involved in the earlier stages of the “*blood donation awareness*  
90 *project: a quasi-experimental*” study (the base-line survey and implementation of the  
91 intervention). Of the 559 students, who consented to participate in the end-line interviews, only  
92 336 completed the questions related to the TPB constructs leading to a response rate of 60.1%.

### 93 **Sampling and procedure**

94 We purposively selected two study districts i.e. Jinja city to represent an urban district and Mayuge  
95 district to represent a rural district. At district level, we worked with the district education officers  
96 to purposively select two secondary schools within each district to represent a highly populated  
97 and low populated school. While at the schools, census sampling was used for the survey and all  
98 the senior four and senior six students were invited to participate in the study. At each school, we

99 called for an assembly where we informed the students about the study, its voluntary nature,  
100 purpose and procedures. All the interested students were given self-administered questionnaires.

## 101 **Questionnaire**

102 Questions on the TPB constructs were included in the end-line survey questionnaire for the “*blood*  
103 *donation awareness project: a quasi-experimental*” study. The questionnaire was developed in  
104 English and consisted of 59 items to assess the TPB constructs.

## 105 **Intention**

106 Intention to donate blood was assessed using four items for instance “*I intend to donate blood in*  
107 *the next blood donation campaign/ event at my school*”. Responses were measured on a five point  
108 Likert scale, ranging from 1 (strongly agree) to 5 (strongly disagree). The Cronbach’s alpha for  
109 this scale was 0.760.

## 110 **Perceived behavioral control**

111 Six items were included to measure perceived behavioral control, for instance “*My school supports*  
112 *me to donate blood*”. The items were measured on a five point Likert scale, ranging from 1  
113 (strongly disagree) to 5 (strongly agree). The Cronbach’s alpha for this scale was 0.717.

## 114 **Subjective norms**

115 To assess the influence of subjective norms on intention to donate blood, we included ten items,  
116 for instance “*My classmates think that blood donation is important*”. Responses were measured

117 on a five-point Likert scale, ranging from 1 (strongly agree) to 5 (strongly disagree). The  
118 Cronbach's alpha for this scale was 0.771.

### 119 **Attitudes**

120 Seven items were used to assess attitudes towards blood donation, for example "*Blood donation*  
121 *is a waste of time*". Responses were measured on a five point Likert scale, ranging from 1 (strongly  
122 agree) to 5 (strongly disagree). The Cronbach's alpha for this scale was 0.765.

### 123 **External factors**

124 In addition to the TPB constructs, the self-administered questionnaire collected data on; the socio-  
125 demographic characteristics (such as; age, sex, academic level etc.), knowledge and practices  
126 regarding blood donation.

### 127 **Pretesting**

128 The questionnaire was pre-tested among 30 secondary students from a school located in Kampala  
129 prior to data collection. The data from the pre-test was not included in the final analysis but was  
130 used to inform adjustments in the tool.

### 131 **Data Management and analysis**

132 Data were entered using Microsoft Access and later exported to STATA 14 for analysis. First, the  
133 distributions of each variable were inspected to check for errors. Reliability tests were then  
134 performed for each TPB construct using the Cronbach's alpha. The Likert scales for each TPB  
135 construct (intention, perceived behavioural control, attitude, and subjective norms) were

136 computed. To obtain each participants' overall score for the individual TPB constructs, we  
137 obtained the mean score all items assessing each construct. The new variable was categorized in  
138 five levels i.e.1 (strongly agree) to 5 (strongly disagree). The outcome variable intention was  
139 computed into a binary variable, categorized as “yes” (Strongly agree and agree) and “no”  
140 (strongly disagree, disagree and neither agree nor disagree). Descriptive statistics were used to  
141 investigate participants' characteristics. Beyond descriptive statistics, associations were analysed  
142 using correlations and regressions.

## 143 **Ethical approval**

144 We obtained ethical approval from Makerere University, School of Public Health Research and  
145 Ethics Committee (protocol no.852). Permission to conduct research was obtained from the  
146 Uganda National Council of Science and Technology (protocol no. HS1243ES) while  
147 administrative clearance was obtained from the district education officers and school head  
148 teachers. The students were required to provide their informed consent before participating in the  
149 study. For those aged <18 years, we obtained parental consent and assent from the students. The  
150 school administration was requested to invite the parents of the students aged <18years. We  
151 explained the purpose of the study to the parents and what it entailed. The parents were then asked  
152 to provide consent for their students to participate in the study.

## 153 **Results**

### 154 **Participants' characteristics**



155 Slightly more than half of the respondents were male (n=188, 56.3%) while the mean age of the  
156 respondents was 19.0 years (SD = 2.2). Nearly half of the students (n=169, 50.3%) were from  
157 schools located in rural areas while majority of them had access to internet (n=237, 71.0%).  
158 Regarding their knowledge about blood donation, slightly less than half of the students (n=164,  
159 48.8%) were knowledgeable about blood donation (Table 1).

160 **Table 1. Characteristics of participants**

| <b>Characteristic</b>     | <b>Frequency (n)</b> | <b>Percentage (%)</b> |
|---------------------------|----------------------|-----------------------|
| <b>Age</b>                | 19.0 (Mean)          | 2.2 (S.D)             |
| Below 17                  | 27                   | 8.0                   |
| Above 17                  | 309                  | 92.0                  |
| <b>Sex</b>                |                      |                       |
| Female                    | 146                  | 43.7                  |
| Male                      | 188                  | 56.3                  |
| <b>Academic level</b>     |                      |                       |
| O-level                   | 174                  | 51.8                  |
| A-level                   | 162                  | 48.2                  |
| <b>Location of school</b> |                      |                       |
| Rural                     | 169                  | 50.3                  |
| Urban                     | 167                  | 49.7                  |
| <b>Access to internet</b> |                      |                       |
| No                        | 97                   | 29.0                  |
| Yes                       | 237                  | 71.0                  |

**Received blood donation information from;**

|                    |     |      |
|--------------------|-----|------|
| School             | 280 | 83.3 |
| Radio/ TV          | 141 | 42.0 |
| Social media       | 105 | 31.3 |
| Blood bank         | 85  | 25.3 |
| Hospital           | 131 | 39.0 |
| Community campaign | 86  | 25.6 |
| Friend             | 111 | 33.0 |

---

**Knowledgeable about blood donation**

|     |     |      |
|-----|-----|------|
| No  | 172 | 51.2 |
| Yes | 164 | 48.8 |

---

**Do you know anyone who donated**

|     |     |      |
|-----|-----|------|
| No  | 47  | 14.1 |
| Yes | 286 | 85.9 |

---

161 Note: SD is standard deviation

162 **Intention to donate blood**

163 About 75% of the students had intention to donate blood sometime in their life time [strongly agree  
164 - 33.3% (n= 112) and agree - 41.7% (n= 140)] while 25% did not intend to donate blood at any  
165 time in their life (See Fig 1).

166 **Fig 1. Students' intention to donate blood**

## 167 Association between TPB constructs

168 As shown in Table 2, significant correlations were found between students' intention to donate  
169 blood and the other TPB constructs, with perceived behavioural control emerging as the strongest  
170 correlate of intention to donate ( $r = 0.496$ ,  $P$  value  $< 0.05$ ). The matrix also revealed a moderate  
171 correlation ( $r = 0.450$ ,  $P$  value  $< 0.05$ ) between influence of subjective norms and intention to  
172 donate blood. Attitudes had a low correlation with intention to donate ( $r = 0.328$ ,  $P$  value  $< 0.05$ )

173 **Table 2. Correlations Between The TPB Constructs**

| Variable         | Intention | PBC    | Attitude | Subjective norms |
|------------------|-----------|--------|----------|------------------|
| Intention        | 1         |        |          |                  |
| PBC              | 0.496*    | 1      |          |                  |
| Attitude         | 0.328*    | 0.342* | 1        |                  |
| Subjective norms | 0.450*    | 0.504* | 0.483*   | 1                |

174 Note: PBC is perceived behavioural control

## 175 Significance of the TPB in predicting intention to donate blood

176 As shown in Table 3, the TPB constructs (attitudes, subjective norms and Perceived behavioural  
177 control) only explained 15.5% of the student's intention to donate blood. Perceived behavioural  
178 control (AOR = 6.35, CI = 3.32, 12.15) was the main predictor of students' intention to donate  
179 blood (See Table 3).

180 **Table 3. Regression analyses of TPB constructs**

| Variables        | COR [95% CI]              | P-Value      | AOR [95% CI]              | P-Value      |
|------------------|---------------------------|--------------|---------------------------|--------------|
| <b>PBC</b>       | <b>8.64 [4.74, 15.74]</b> | <b>0.000</b> | <b>6.35 [3.32, 12.15]</b> | <b>0.000</b> |
| Attitude         | 2.49 [1.45, 4.26]         | 0.001        | 1.51[0.80, 2.87]          | 0.206        |
| Subjective norms | 4.75 [2.56, 8.82]         | 0.000        | 1.97 [0.92, 4.20]         | 0.080        |

181 Note: R-Square for the multivariable model = 0.155

182 PBC is perceived behavioural control

183 **Relationship between perceived behavioural control and intention to**  
 184 **donate blood**

185 Further analysis showed that the student’s perception about their ability to donate blood (AOR =  
 186 2.42, CI = 1.77, 3.29), support from the school (AOR = 1.48, CI = 1.12, 1.97) and support from  
 187 other stakeholder involved in blood donation (AOR = 1.43, CI = 1.07, 1.90) were the key domains  
 188 of perceived behavioural control that influenced student’s intention to donate blood. (Table 4).

189 **Table 4. Regression analysis of perceived behavioural control and intention to donate blood**

| Variables                                                                   | COR [95% CI]             | P-Value      | AOR [95% CI]             | P-Value      |
|-----------------------------------------------------------------------------|--------------------------|--------------|--------------------------|--------------|
| It’s up to me whether or not I donate blood                                 | 1.38 [1.14, 1.66]        | 0.001        | 1.10 [0.87, 1.40]        | 0.429        |
| <b>I am able to donate blood</b>                                            | <b>2.80 [2.13, 3.66]</b> | <b>0.000</b> | <b>2.42 [1.77, 3.29]</b> | <b>0.000</b> |
| I have all information and knowledge I<br>need to know about blood donation | 1.45 [1.18, 1.77]        | 0.000        | 1.12 [0.87, 1.44]        | 0.394        |
| I have the opportunity to donate blood                                      | 1.88 [1.49, 2.38]        | 0.000        | 0.99 [0.72, 1.36]        | 0.943        |
| <b>My school supports me to donate blood</b>                                | <b>2.04 [1.61, 2.57]</b> | <b>0.000</b> | <b>1.48 [1.12, 1.97]</b> | <b>0.006</b> |

Stakeholders involved in donation                      1.84 [1.47, 2.31]                      0.000                      1.43 [1.07, 1.90]                      0.015

support me to donate blood

190    **Significance of external variables and the TPB Constructs in**  
 191    **predicting students' intention to donate blood**

192    When external variables were added to the model, 23.5% variance in the students' intention to  
 193    donate blood was explained by the new model. The multivariable model also shows that perceived  
 194    behavioural control (AOR = 6.31, CI = 3.11, 12.79) was the only TPB construct significantly  
 195    associated with intention to donate. Additionally, students from an urban school (AOR = 0.50, CI  
 196    = 0.27, 0.93) and those who knew someone who had ever donated blood (AOR = 0.26, CI = 0.12,  
 197    0.56) were likely to have low intentions to donate.

198    **Table 5. Multivariable regression analysis of TPB constructs adjusting for socio-**  
 199    **demographic variables to predict intention to donate blood**

| Variables                       | AOR [95% CI]              | P-Value      |
|---------------------------------|---------------------------|--------------|
| <b>PBC</b>                      | <b>6.31 [3.11, 12.79]</b> | <b>0.000</b> |
| Attitude                        | 1.32 [0.67, 2.60]         | 0.429        |
| Subjective norms                | 1.48 [0.65, 3.41]         | 0.354        |
| Age                             | 0.75 [0.25, 2.22]         | 0.602        |
| Sex                             | 0.62 [0.33, 1.14]         | 0.125        |
| Academic level                  | 0.61 [0.32, 1.16]         | 0.131        |
| <b>Urban location of school</b> | <b>0.50 [0.27, 0.93]</b>  | <b>0.028</b> |

|                                    |                          |              |
|------------------------------------|--------------------------|--------------|
| Access to internet                 | 0.64 [0.34, 1.22]        | 0.178        |
| Knowledgeable about blood donation | 0.68 [0.37, 1.26]        | 0.225        |
| <b>knew anyone who donated</b>     | <b>0.26 [0.12, 0.56]</b> | <b>0.001</b> |

---

200 Note: R-Square for the multivariable model = 0.2345

## 201 **Discussion**

202 We aimed at applying the TPB to determine students' intention to donate blood. Our findings  
203 showed that majority of the students intended to donate blood at some point in their life. This  
204 finding is similar to that of a previous study conducted among residential students and their  
205 teachers in Bangladesh which found that majority of the respondents were willing to donate blood  
206 to an unknown person [22]. This could be attributed to the fact that donating blood can potentially  
207 save lives [23] and therefore, most people are willing to donate so as to save lives. Considering  
208 that students already have a high intention to donate blood, it is therefore important that they have  
209 the appropriate information regarding blood donation and are also provided with avenues to donate  
210 blood. Another study conducted among private higher education students in Ethiopia showed that  
211 the mean intention to donate blood was low [24]. The difference between the two studies could be  
212 attributed to the fact that the present study was conducted after a blood donation awareness  
213 campaign [21] which could have influenced the students' willingness to donate.

214 This study further showed that the TPB was a weak predictor of the student's intention to donate  
215 blood. This finding differs from those of a study conducted among the students in Ethiopia where  
216 the TPB explained more than half of the students' intention to donate blood [24, 25]. This could  
217 be attributed to the difference in the study areas. Among the TPB constructs, only perceived  
218 behavioural control significantly predicted the students' intention to donate blood after adjusting

219 for other TPB constructs. The perceived behavioural control domains that were significantly  
220 associated with blood donation were perceived support from school and other stakeholders  
221 involved in blood donation. Other studies have also found PBC to be associated with the intention  
222 to donate blood [10, 24]. This finding implies that students who intend to donate blood in their life  
223 time are those who are confident enough to donate [10]. Therefore, the Uganda blood transfusion  
224 services should work with the school administrations to make the process of blood donation and  
225 the environment where donation is carried out more conducive so as to boost student's confidence  
226 to donate blood.

227 This study showed that the influence of subjective norms and the attitude towards blood donation  
228 did not significantly predict students' intention to donate blood. Incongruent with this finding,  
229 Kassie and others [10], found subjective norms and attitude domains to be significant predictors  
230 of blood donation intentions. The difference between the two studies could be attributed to the  
231 difference in the study populations. Whereas the present study was conducted among secondary  
232 school students, the former study was conducted among adults in the community. Nonetheless,  
233 Faqah et al. [25], also found that subjective norms did not influence students' intention to donate  
234 blood. This may imply that for altruistic behaviours like blood donation, significant others do not  
235 influence the intention to perform a behaviour but rather an individuals' perception of their  
236 confidence to perform a behaviour.

237 The variance explained by the model increased when external factors were added to the model,  
238 implying that external factors (such as; social demographic characteristics and knowledge about  
239 blood donation) are key predictors of blood donation behaviours. The study further showed that  
240 the students who were in urban schools had a lower intention to donate blood compared to those  
241 in rural areas. This finding differs from that of a study conducted in Nigeria to assess rural-urban

242 variation in willingness to donate blood which showed that urban dwellers were more willing to  
243 donate blood than rural dwellers [26]. This finding could be attributed to the difference in the  
244 socio-demographic characteristics between rural and urban students or could be due to lack of  
245 awareness of the blood donation sites. Therefore, the ministry of health should continue partnering  
246 with other institution to create awareness of the different blood donation sites.

247 Surprisingly, the students who knew someone who had donated had a lower intention to donate  
248 blood compared to those who did not know anyone who had donated. Again, this finding may  
249 imply that for altruistic behaviours like blood donation, significant others do not influence the  
250 intention to perform a behaviour but rather an individuals' perception of their confidence to  
251 perform a behaviour.

## 252 **Study Limitations**

253 The main limitation of this study was related to the study design. We conducted a cross-sectional  
254 study to assess student's intention to donate blood. Whereas the findings of this study reflect the  
255 students' intention to donate blood at the time of the survey, there could have been changes in the  
256 students' perceptions towards blood donation. The second limitation was related to the outcome  
257 used in this study. The study assessed students' intention to donate blood rather than their actual  
258 blood donation practice.

## 259 **Conclusion**

260 Most students had an intention to donate blood at some point in their life. The TPB was a weak  
261 predictor of the student's intention to donate blood. Our study found that perceived behavioural  
262 control was main determinant of intentions to donated blood. Subjective norms and attitudes



263 towards blood donation did not significantly influence the students' intentions to donate. This  
264 could imply that for altruistic behaviours such as blood donation, attitudes towards donating blood  
265 do not matter but rather the persons' perception of their ability to donate blood. Interventions  
266 should therefore be designed to make the internal and external environment of the students  
267 favourable for the students to donate blood.

## 268 **Acknowledgements**

269 We would like to acknowledge the teachers and head teachers of Bunya secondary school, Jinja  
270 secondary school, Delta High School and St. James' secondary school for giving use permission  
271 to conduct this study and for all the support rendered during the implementation of the study. We  
272 also acknowledge the blood donation champions in all the schools who worked with us to educate  
273 other students on the different aspects of blood donation. We also appreciate the students who took  
274 part in the study and completed both the baseline and end-line surveys.

## 275 **References**

- 276 1. WHO. World Blood Donor Day: Be there for someone else. Give blood. Share life.  
277 Online2018 [5th November, 2023]. Available from: [https://www.who.int/campaigns/world-blood-](https://www.who.int/campaigns/world-blood-donor-day/2018)  
278 [donor-day/2018](https://www.who.int/campaigns/world-blood-donor-day/2018).
- 279 2. Jenny HE, Saluja S, Sood R, Raykar N, Kataria R, Tongaonkar R, et al. Access to safe  
280 blood in low-income and middle-income countries: lessons from India. *BMJ Global Health*.  
281 2017;2(2):bmjgh-2016-000167.
- 282 3. Dhingra N. World blood donor day: new blood for the world. World Health Organization.  
283 2013.

- 284 4. WHO. Blood safety and availability. Fact sheet. Online2023 [6th November, 2023].  
285 Available from: [https://www.who.int/en/news-room/fact-sheets/detail/blood-safety-and-](https://www.who.int/en/news-room/fact-sheets/detail/blood-safety-and-availability)  
286 [availability](https://www.who.int/en/news-room/fact-sheets/detail/blood-safety-and-availability).
- 287 5. Bloch EM, Vermeulen M, Murphy E. Blood transfusion safety in Africa: a literature review  
288 of infectious disease and organizational challenges. *Transfusion medicine reviews*.  
289 2012;26(2):164-80.
- 290 6. Zanin TZ, Hersey DP, Cone DC, Agrawal P. Tapping into a vital resource: Understanding  
291 the motivators and barriers to blood donation in Sub-Saharan Africa. *African Journal of*  
292 *Emergency Medicine*. 2016;6(2):70-9.
- 293 7. Okiror S, , January 16. . Doctors in Uganda Warn 'crisis Level' Blood Shortage Is Putting  
294 Lives at Risk. Online: The Guardian.; 2018 [18th November, 2023]. Available from:  
295 [https://www.theguardian.com/global-development/2018/jan/16/doctors-uganda-warn-crisis-](https://www.theguardian.com/global-development/2018/jan/16/doctors-uganda-warn-crisis-level-blood-shortage-risks-lives#:~:text=Uganda%20is%20grappling%20with%20a,to%20hospitals%2C%20is%20practical)  
296 [level-blood-shortage-risks-](https://www.theguardian.com/global-development/2018/jan/16/doctors-uganda-warn-crisis-level-blood-shortage-risks-lives#:~:text=Uganda%20is%20grappling%20with%20a,to%20hospitals%2C%20is%20practical)  
297 [lives#:~:text=Uganda%20is%20grappling%20with%20a,to%20hospitals%2C%20is%20practical](https://www.theguardian.com/global-development/2018/jan/16/doctors-uganda-warn-crisis-level-blood-shortage-risks-lives#:~:text=Uganda%20is%20grappling%20with%20a,to%20hospitals%2C%20is%20practical)  
298 [ly%20empty](https://www.theguardian.com/global-development/2018/jan/16/doctors-uganda-warn-crisis-level-blood-shortage-risks-lives#:~:text=Uganda%20is%20grappling%20with%20a,to%20hospitals%2C%20is%20practical).
- 299 8. CDC. Global Health Initiative Executive Director Opens CDC-Supported Uganda Blood  
300 Transfusion Service Headquarters Online: Centers for Disease Control and Prevention; 2010 [6th  
301 November, 2023].
- 302 9. Murtagh CM, Katulamu C. Motivations and deterrents toward blood donation in Kampala,  
303 Uganda. *Social Science & Medicine*. 2021;272:113681.
- 304 10. Kassie A, Azale T, Nigusie A. Intention to donate blood and its predictors among adults of  
305 Gondar city: Using theory of planned behavior. *PloS one*. 2020;15(3):e0228929.

- 306 11. Uganda I. Knowledge, attitudes, and practices about regular, voluntary nonremunerated  
307 blood donation in Peri-urban and rural communities in Mbarara District, South Western Uganda,  
308 and its Impact on Maternal Health. *J Obstet Gynaecol Can.* 2015;37(10):903-4.
- 309 12. Godin G, Conner M, Sheeran P, Bélanger-Gravel A, Germain M. Determinants of repeated  
310 blood donation among new and experienced blood donors. *Transfusion.* 2007;47(9):1607-15.
- 311 13. Schlumpf KS, Glynn SA, Schreiber GB, Wright DJ, Randolph Steele W, Tu Y, et al.  
312 Factors influencing donor return. *Transfusion.* 2008;48(2):264-72.
- 313 14. Ajzen I. The theory of planned behavior. *Organizational behavior and human decision*  
314 *processes.* 1991;50(2):179-211.
- 315 15. Ajzen I. *The theory of planned behaviour: Reactions and reflections.* Taylor & Francis;  
316 2011. p. 1113-27.
- 317 16. Ajzen I. From intentions to actions: A theory of planned behavior. *Action control: From*  
318 *cognition to behavior:* Springer; 1985. p. 11-39.
- 319 17. Wise D, Goggin KJ, Gerkovich MM, Metcalf KA, Kennedy SL. Predicting intentions to  
320 use condoms using gender, sexual experience, and the theory of planned behavior. *American*  
321 *Journal of Health Education.* 2006;37(4):210-8.
- 322 18. Huang M, Chen I, Chung S. The Theory of Planned Behavior for the Improvement of the  
323 Delayed Blood Donation Cycle, Optimization of the Planning Behavior, and Donor Intention.  
324 *BioMed Research International.* 2022;2022.
- 325 19. Abd Hamid NZ, Basiruddin R, Hassan N. Factors influencing the intention to donate blood:  
326 The application of the theory of planned behavior. *International Journal of Social Science and*  
327 *Humanity.* 2013;3(4):344.

- 328 20. Parash MH, Suki N, Shimmi S, Hossain A, Murthy K. Examining students' intention to  
329 perform voluntary blood donation using a theory of planned behaviour: a structural equation  
330 modelling approach. *Transfusion Clinique et Biologique*. 2020;27(2):70-7.
- 331 21. Kiwanuka SN, Akulume M, Nankya FR, Kisakye AN. Evaluating the effect of targeted  
332 knowledge sharing on blood donation awareness and practices among secondary school students:  
333 A quasi-experimental study in Eastern Uganda. 2024.
- 334 22. Hossain MS, Siam MHB, Hasan MN, Jahan R, Siddiquee MH. Knowledge, attitude, and  
335 practice towards blood donation among residential students and teachers of religious institutions  
336 in Bangladesh—A cross-sectional study. *Heliyon*. 2022;8(10).
- 337 23. Conceição VMd, Araújo JS, Oliveira RAAd, Santana MEd, Zago MMF. Perceptions of  
338 donors and recipients regarding blood donation. *Revista brasileira de hematologia e hemoterapia*.  
339 2016;38:220-4.
- 340 24. Aschale A, Fufa D, Kekeba T, Birhanu Z. Intention to voluntary blood donation among  
341 private higher education students, Jimma town, Oromia, Ethiopia: Application of the theory of  
342 planned behaviour. *PLoS One*. 2021;16(3):e0247040.
- 343 25. Faqah A, Moiz B, Shahid F, Ibrahim M, Raheem A. Assessment of blood donation  
344 intention among medical students in Pakistan—An application of theory of planned behavior.  
345 *Transfusion and Apheresis Science*. 2015;53(3):353-9.
- 346 26. Gbadamosi FI, Popoola Y, Olaniyan F, Adesola RO, Unim B. Rural-urban variation in  
347 willingness to donate blood in Ibadan Region, Nigeria. *Annali dell'Istituto Superiore di Sanita*.  
348 2023;59(2):114-21.
- 349

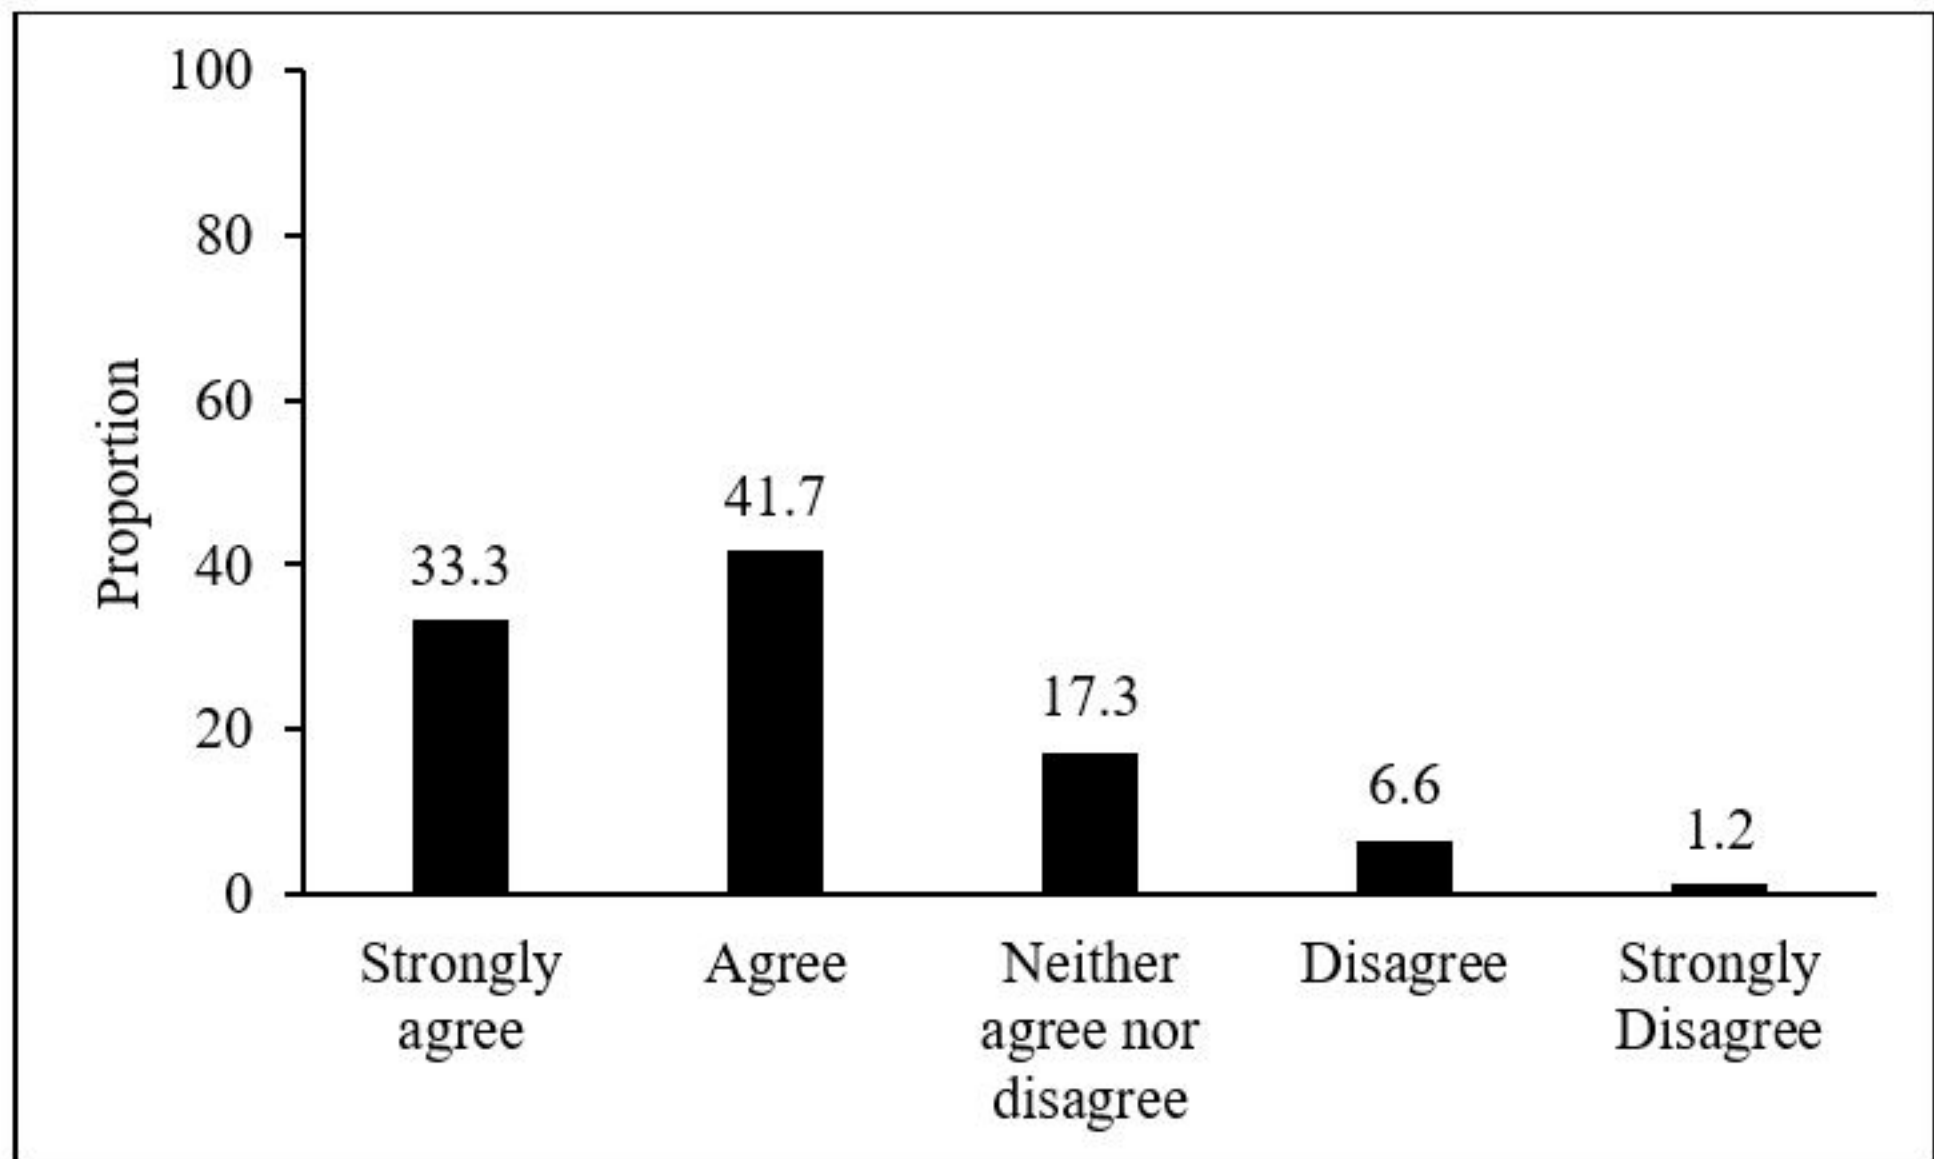

Figure
